# Supplementary material for: Sn(ii,iv) steric and electronic structure effects enable self-selective doping on Fe/Si-sites of Li2FeSiO4nanocrystals for high performance lithium ion batteries
Source: Royal Society of Chemistry journal article supplement (doi:10.1039/c5ta06713h), 2015-01-01
Supplement: c5ta06713h1.pdf [file c5ta06713h1.pdf]

Supporting Information for

**Sn(II, IV) steric and electronic structure effects enable self-selective doping on Fe/Si-sites of  $\text{Li}_2\text{FeSiO}_4$  nano-crystals for high performance lithium ion batteries**

Kai Wang<sup>†</sup>, Gaofeng Teng<sup>†</sup>, Jinlong Yang<sup>†</sup>, Rui Tan, Yandong Duan, Jiaxin Zheng, Feng Pan\*

School of Advanced Materials, Peking University Shenzhen Graduate School, Shenzhen 518055, People's Republic of China, E-mail: panfeng@pkusz.edu.cn

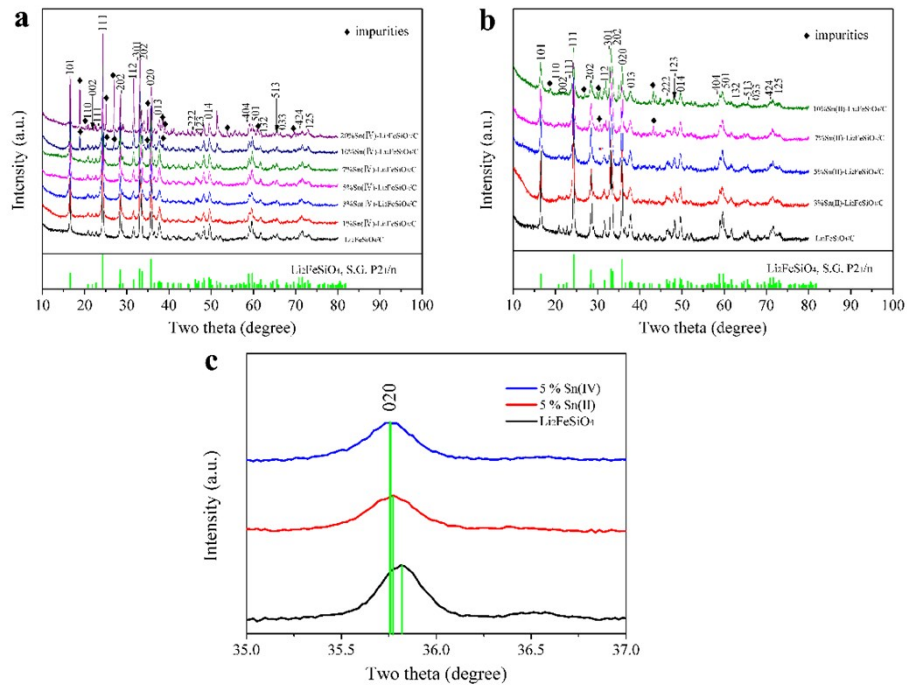

Figure S1 (a) XRD patterns of Sn(IV)-doped  $\text{Li}_2\text{FeSiO}_4/\text{C}$  samples, (b) XRD patterns of Sn(II)-doped  $\text{Li}_2\text{FeSiO}_4/\text{C}$  samples; (c) detailed XRD patterns of  $\text{Li}_2\text{FeSiO}_4/\text{C}$ , 5% Sn(II)- $\text{Li}_2\text{FeSiO}_4/\text{C}$  and 5% Sn(IV)- $\text{Li}_2\text{FeSiO}_4/\text{C}$  between  $35^\circ$  to  $37^\circ$ .

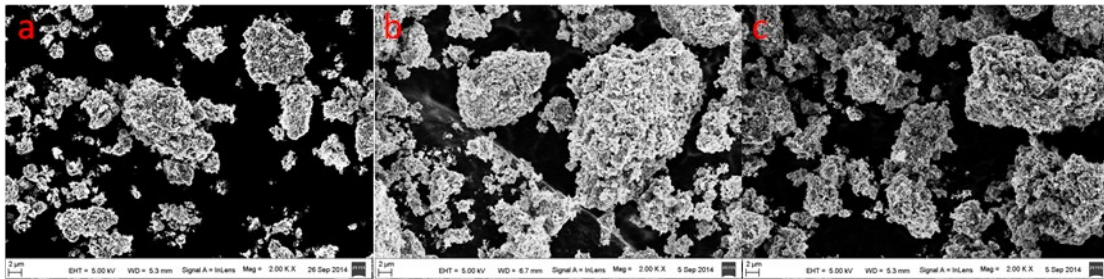

Figure S2a SEM images of (a) the pristine, (b) 5% Sn(II) and (c) 5% Sn(IV) doped  $\text{Li}_2\text{FeSiO}_4/\text{C}$ .

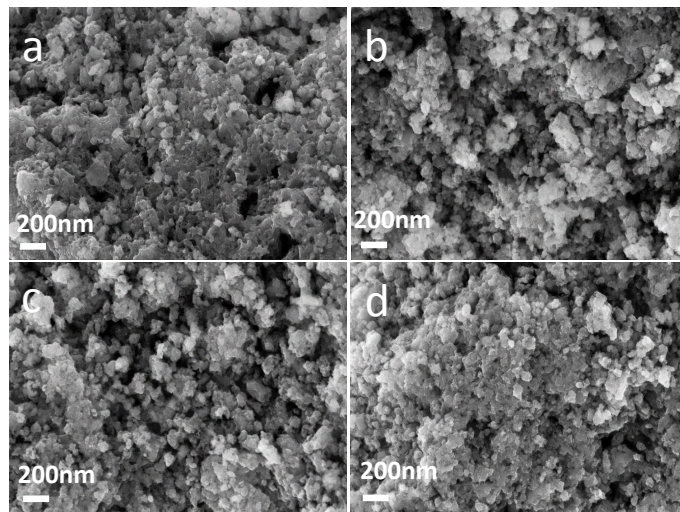

Figure S2b SEM image of different ratios of Sn(IV) doped  $\text{Li}_2\text{FeSiO}_4/\text{C}$  samples: (a) 1%, (b) 3%, (c) 5%, (d) 7%.

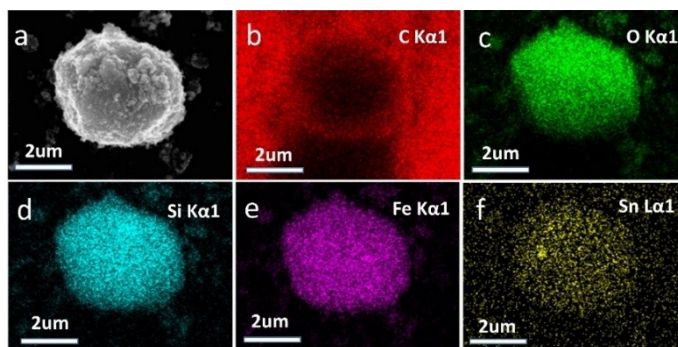

Figure S3a EDS mapping of 5 % Sn(II)-Li<sub>2</sub>FeSiO<sub>4</sub>/C.

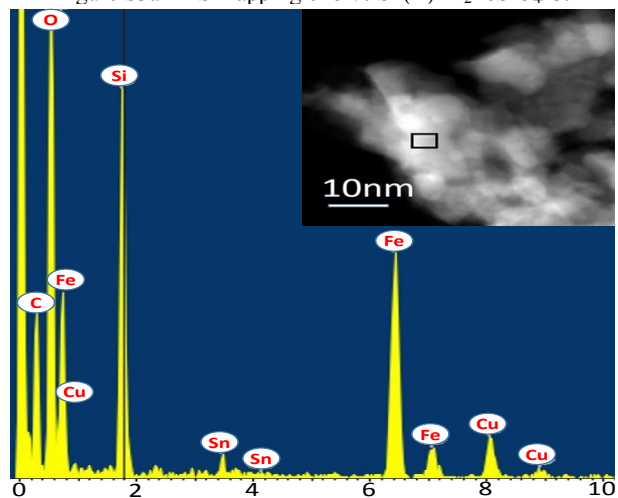

Figure S3b EDS mapping of 5 % Sn(II)-Li<sub>2</sub>FeSiO<sub>4</sub>/C obtained by TEM test in a small scale bar (the rectangular block in the insert picture is the EDS mapping zone).

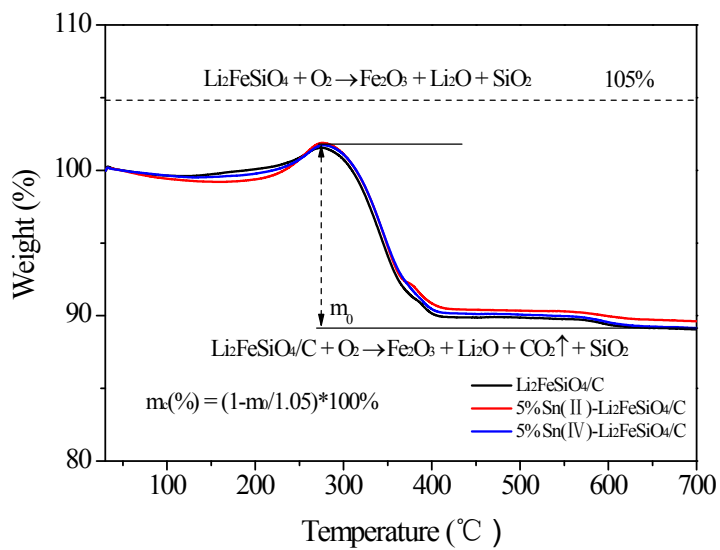

Figure S4 TG analysis of Li<sub>2</sub>FeSiO<sub>4</sub>/C, 5 % Sn(II)-Li<sub>2</sub>FeSiO<sub>4</sub>/C and 5 % Sn(IV)-Li<sub>2</sub>FeSiO<sub>4</sub>/C.

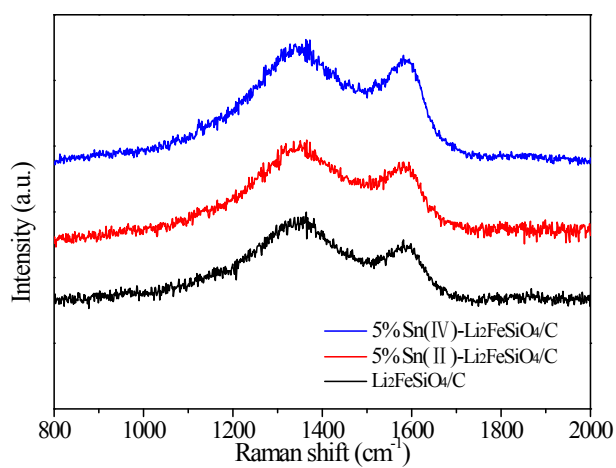

Figure S5 Raman spectra of  $\text{Li}_2\text{FeSiO}_4/\text{C}$ , 5 % Sn(II)- $\text{Li}_2\text{FeSiO}_4/\text{C}$  and 5 % Sn(IV)- $\text{Li}_2\text{FeSiO}_4/\text{C}$ .

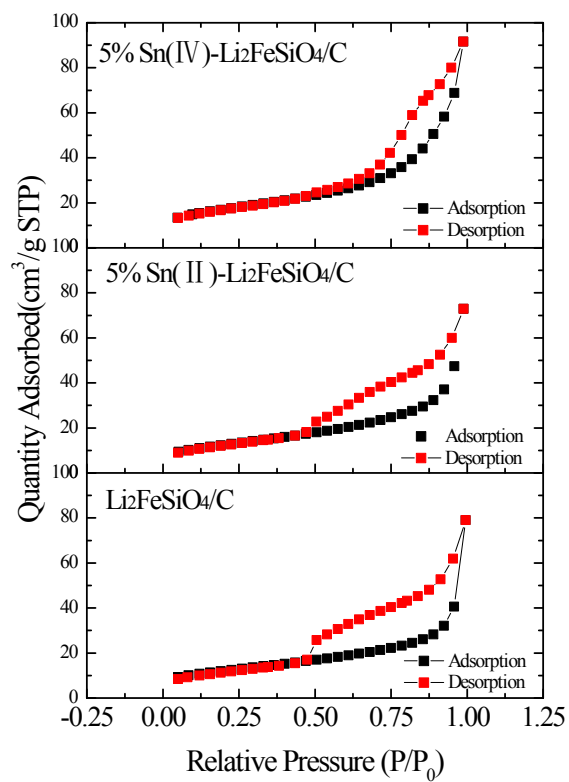

Figure S6 Nitrogen adsorption and desorption isotherms at 77.47 K.

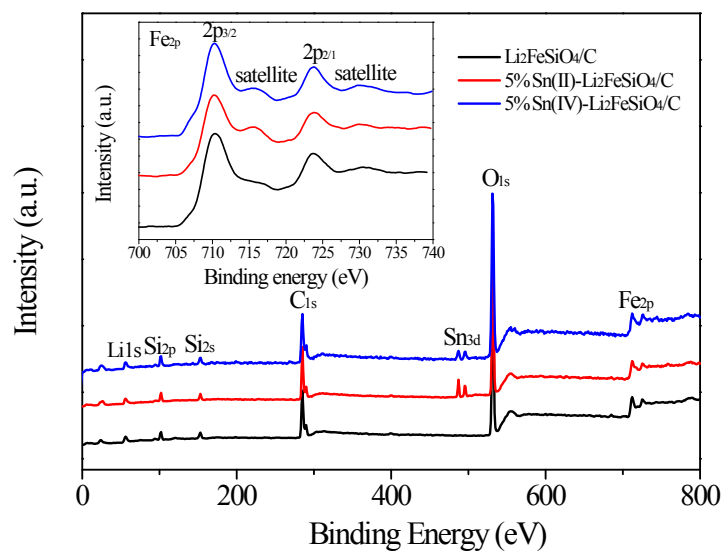

Figure S7 XPS spectra of samples (the insert picture is the spectra of Fe2p). Fe 2p spectra of all of the three samples are split in two parts due to spin-orbit coupling, namely Fe 2p<sub>3/2</sub> and Fe 2p<sub>1/2</sub>, with an intensity ratio of about 2/1. Each part consists of a main peak and a “shake-up” satellite.<sup>1</sup> For Li<sub>2</sub>FeSiO<sub>4</sub>, Fe 2p<sub>3/2</sub> main peak at 710 eV with a satellite peak at 715eV, and Fe 2p<sub>1/2</sub> main peak at 724 eV with a satellite peak at 729eV, meaning that tin doping doesn't affect the valance state of iron in Li<sub>2</sub>FeSiO<sub>4</sub>, the oxidation state of Fe in all of the three samples is +2.

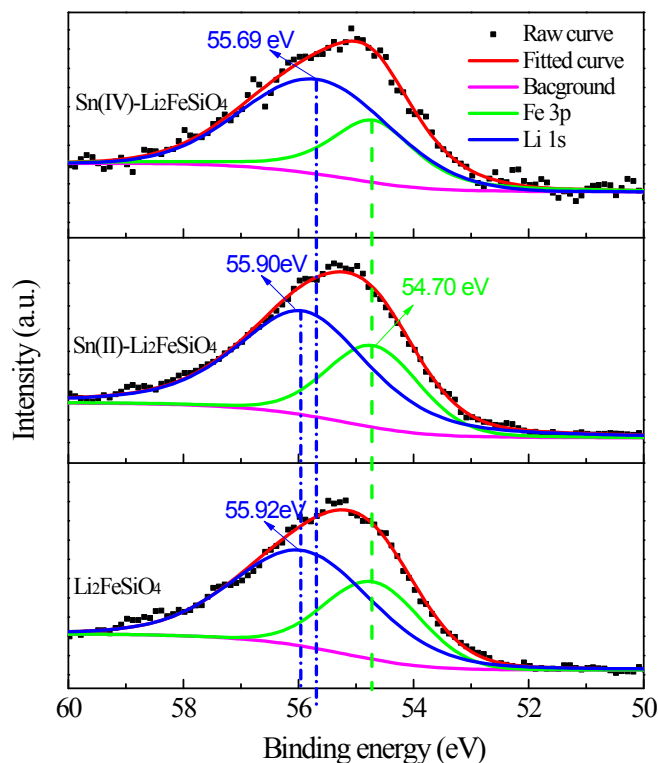

Figure S8. Fitted Li 1s and Fe 3p spectra of spectra of Li<sub>2</sub>FeSiO<sub>4</sub>/C, 5 % Sn(II)-Li<sub>2</sub>FeSiO<sub>4</sub>/C and 5 % Sn(IV)-Li<sub>2</sub>FeSiO<sub>4</sub>/C.

Table S1 Ratios of Sn(II) and Sn(IV) in different amount of Sn(IV) doped  $\text{Li}_2\text{FeSiO}_4/\text{C}$  samples.

| Samples    | Sn(II) | Sn(IV) |
|------------|--------|--------|
| 1 % doping | 64.4 % | 35.6 % |
| 3 % doping | 61.0 % | 39.0 % |
| 5 % doping | 41.6 % | 58.4 % |
| 7 % doping | 33.7 % | 66.3 % |

Table S2.1 Atomic coordination for the pristine  $\text{Li}_2\text{FeSiO}_4$  obtained from Rietveld refinement.

| Site | Np | x           | y           | z           | Atom | Occ |
|------|----|-------------|-------------|-------------|------|-----|
| Li1  | 4  | 0.66300     | 0.78500     | 0.66900     | Li+  | 1   |
| Li2  | 4  | 0.58500     | 0.19300     | 0.08400     | Li+  | 1   |
| Fe1  | 4  | 0.28934(62) | 0.79877(59) | 0.54376(59) | Fe2+ | 1   |
| Si1  | 4  | 0.04110(97) | 0.8040(12)  | 0.7971(10)  | Si4+ | 1   |
| O1   | 4  | 0.8646(23)  | 0.7031(25)  | 0.8167(21)  | O2-  | 1   |
| O2   | 4  | 0.4221(23)  | 0.2168(17)  | 0.8933(22)  | O2-  | 1   |
| O3   | 4  | 0.6914(23)  | 0.7685(20)  | 0.4322(22)  | O2-  | 1   |
| O4   | 4  | 0.9665(15)  | 0.8618(14)  | 0.2078(15)  | O2-  | 1   |

Table S2.2 Atomic coordination for the 5 % Sn(II)- $\text{Li}_2\text{FeSiO}_4$  obtained from Rietveld refinement.

| Site | Np | x           | y           | z           | Atom | Occ  |
|------|----|-------------|-------------|-------------|------|------|
| Li1  | 4  | 0.66300     | 0.78500     | 0.66900     | Li+  | 1    |
| Li2  | 4  | 0.58500     | 0.19300     | 0.08400     | Li+  | 1    |
| Fe1  | 4  | 0.28013(58) | 0.79368(84) | 0.55101(50) | Fe2+ | 0.95 |
|      |    |             |             |             | Sn2+ | 0.05 |
| Si1  | 4  | 0.0353(12)  | 0.8138(15)  | 0.8020(12)  | Si4+ | 1    |
| O1   | 4  | 0.8848(24)  | 0.7359(39)  | 0.8139(23)  | O2-  | 1    |
| O2   | 4  | 0.4187(24)  | 0.2219(22)  | 0.9073(23)  | O2-  | 1    |
| O3   | 4  | 0.6993(22)  | 0.7788(29)  | 0.4389(19)  | O2-  | 1    |
| O4   | 4  | 0.9828(19)  | 0.8490(21)  | 0.1986(18)  | O2-  | 1    |

Table S2.3 Atomic coordination for the 5 % Sn(IV)- $\text{Li}_2\text{FeSiO}_4$  obtained from Rietveld refinement.

| Site | Np | x           | y           | z           | Atom | Occ    |
|------|----|-------------|-------------|-------------|------|--------|
| Li1  | 4  | 0.66300     | 0.78500     | 0.66900     | Li+  | 1      |
| Li2  | 4  | 0.58500     | 0.19300     | 0.08400     | Li+  | 1      |
| Fe1  | 4  | 0.29560(61) | 0.79769(73) | 0.53460(61) | Fe2+ | 0.9792 |
|      |    |             |             |             | Sn2+ | 0.0208 |
| Si1  | 4  | 0.04829(86) | 0.8130(13)  | 0.78591(93) | Si4+ | 0.9708 |
|      |    |             |             |             | Sn4+ | 0.0292 |
| O1   | 4  | 0.8433(22)  | 0.7125(40)  | 0.8246(25)  | O2-  | 1      |
| O2   | 4  | 0.4301(23)  | 0.2121(20)  | 0.8842(23)  | O2-  | 1      |
| O3   | 4  | 0.6850(22)  | 0.7826(22)  | 0.4390(23)  | O2-  | 1      |
| O4   | 4  | 0.9575(16)  | 0.8518(16)  | 0.2129(18)  | O2-  | 1      |

Table S3 the calculated effective radius of Fe<sup>2+</sup>, Si<sup>4+</sup>, Sn<sup>4+</sup>, Sn<sup>2+</sup> in tetrahedra.

|                  | r <sub>0</sub> (Å) | k | z  | r <sub>k-calculated</sub> (Å) | r <sub>k-reference2</sub> (Å) |
|------------------|--------------------|---|----|-------------------------------|-------------------------------|
| Fe <sup>2+</sup> | 0.286              | 4 | +2 | 0.59                          | 0.63                          |
| Si <sup>4+</sup> | -0.076             | 4 | +4 | 0.26                          | 0.26                          |
| Sn <sup>4+</sup> | 0.318              | 4 | +4 | 0.57                          | 0.55                          |
| Sn <sup>2+</sup> | 0.781              | 4 | +2 | 1.00                          | none                          |

the effective radius of Fe<sup>2+</sup>, Si<sup>4+</sup>, Sn<sup>4+</sup>, Sn<sup>2+</sup> in tetrahedra (r<sub>k-calculated</sub> (Å)) were calculated by the relationship between the cationic radii and the coordination number:<sup>3</sup>

$$r_k = r_0 + dk - \frac{0.0236k}{z}$$

where r<sub>0</sub> is the radius of free cation, z is the valence, k is the coordination number and

$$d = 0.1177 - 0.0081z - 0.0347r_0 - 0.0050zr_0$$

Table S4. Calculated Lattice Parameters (in Å) and Volume (in Å<sup>3</sup>) for Li<sub>x</sub>FeSiO<sub>4</sub>, Li<sub>x</sub>Fe<sub>0.94</sub>Sn<sub>0.06</sub>SiO<sub>4</sub> and Li<sub>x</sub>FeSi<sub>0.94</sub>Sn<sub>0.06</sub>O<sub>4</sub> (x = 0, 0.5, 1, 2)

|                                                                          | a / Å  | b / Å  | c / Å  | V/Å <sup>3</sup> (f.u) <sup>-1</sup> | ΔV/V    |
|--------------------------------------------------------------------------|--------|--------|--------|--------------------------------------|---------|
| Li <sub>2</sub> FeSiO <sub>4</sub>                                       | 10.045 | 10.985 | 12.534 | 86.46                                |         |
| LiFeSiO <sub>4</sub>                                                     | 10.163 | 10.458 | 13.402 | 89.04                                | 2.98 %  |
| Li <sub>0.5</sub> FeSiO <sub>4</sub>                                     | 10.349 | 10.567 | 13.685 | 93.52                                | 8.17 %  |
| FeSiO <sub>4</sub>                                                       | 10.756 | 10.835 | 14.969 | 109.03                               | 26.1 %  |
| Li <sub>2</sub> Fe <sub>0.94</sub> Sn <sub>0.06</sub> SiO <sub>4</sub>   | 10.083 | 11.020 | 12.549 | 87.16                                |         |
| LiFe <sub>0.94</sub> Sn <sub>0.06</sub> SiO <sub>4</sub>                 | 10.161 | 10.446 | 13.502 | 89.58                                | 2.77 %  |
| Li <sub>0.5</sub> Fe <sub>0.94</sub> Sn <sub>0.06</sub> SiO <sub>4</sub> | 10.365 | 10.626 | 13.614 | 93.72                                | 7.52 %  |
| Fe <sub>0.94</sub> Sn <sub>0.06</sub> SiO <sub>4</sub>                   | 10.734 | 10.843 | 14.981 | 108.97                               | 25.02 % |
| Li <sub>2</sub> FeSi <sub>0.94</sub> Sn <sub>0.06</sub> O <sub>4</sub>   | 10.063 | 11.026 | 12.581 | 87.25                                |         |
| LiFeSi <sub>0.94</sub> Sn <sub>0.06</sub> O <sub>4</sub>                 | 10.196 | 10.492 | 13.463 | 90.03                                | 3.19 %  |
| Li <sub>0.5</sub> FeSi <sub>0.94</sub> Sn <sub>0.06</sub> O <sub>4</sub> | 10.406 | 10.580 | 13.742 | 94.58                                | 8.40 %  |
| FeSi <sub>0.94</sub> Sn <sub>0.06</sub> O <sub>4</sub>                   | 10.776 | 10.792 | 15.012 | 109.12                               | 25.07 % |

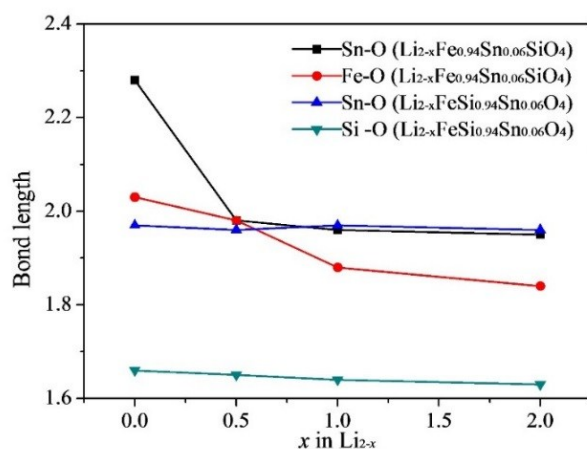

Figure S9. The calculated average bond length for  $\text{SnO}_4$  and  $\text{FeO}_4$  in  $\text{Li}_x\text{Fe}_{0.94}\text{Sn}_{0.06}\text{SiO}_4$ ,  $\text{SnO}_4$  and  $\text{SiO}_4$  in  $\text{Li}_x\text{FeSi}_{0.94}\text{Sn}_{0.06}\text{O}_4$ .

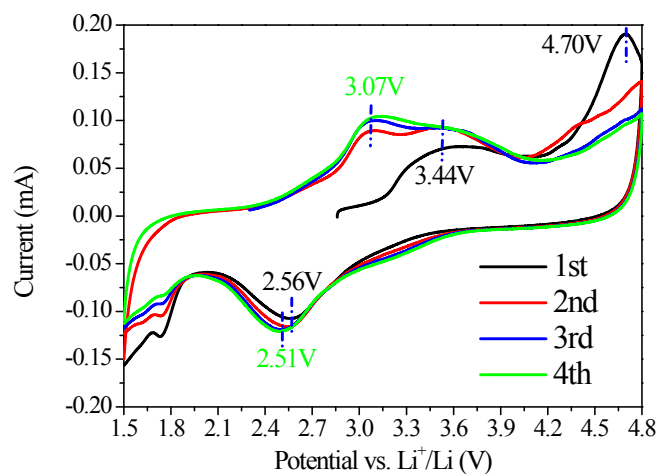

Figure S10. Cyclic voltammograms of 5 % Sn(II)- $\text{Li}_2\text{FeSiO}_4/\text{C}$  at  $0.2 \text{ mV s}^{-1}$ .

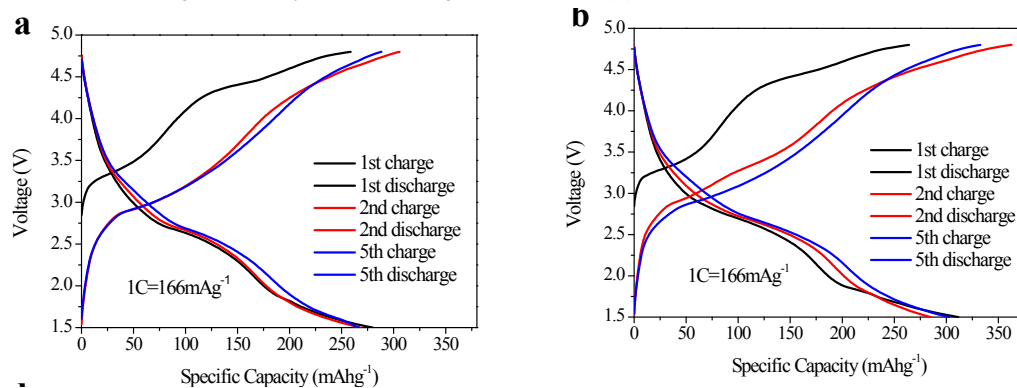

Figure S11. Charge-discharge profiles of (a)  $\text{Li}_2\text{FeSiO}_4/\text{C}$  and (b) 5 % Sn(II)- $\text{Li}_2\text{FeSiO}_4/\text{C}$  at  $0.2 \text{ C}$  ( $IC = 166 \text{ mA g}^{-1}$ ).



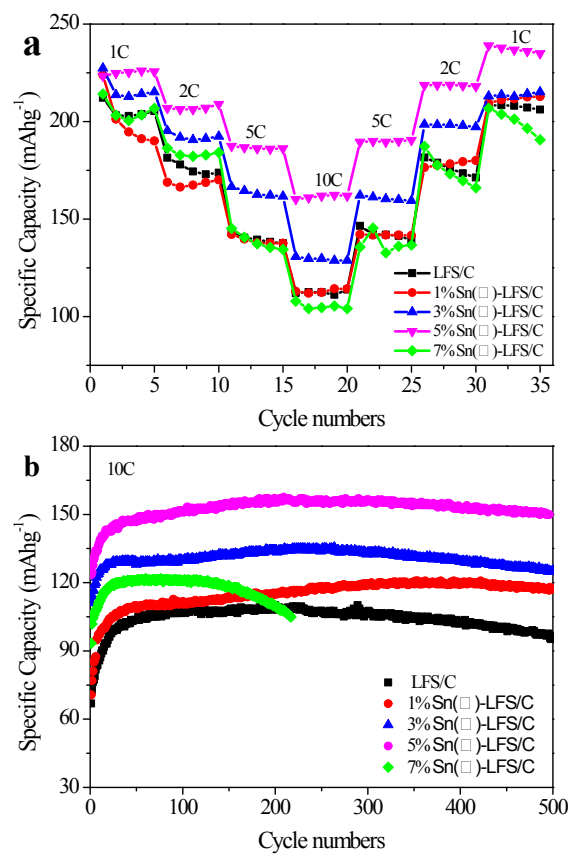

Figure S12. (a) Cyclic performance of different ratios of Sn(IV) doped  $\text{Li}_2\text{FeSiO}_4$  at different rates, (b) Long-term high rate cycling life of different ratios of Sn(IV) doped  $\text{Li}_2\text{FeSiO}_4$  at 10 C for 500 cycles.

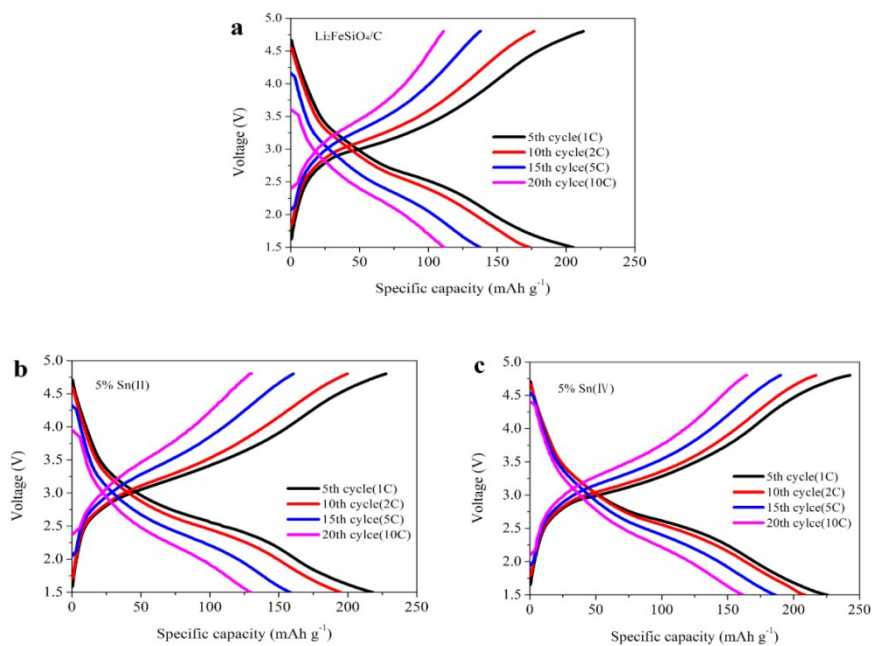

Figure S13 Typical charge-discharge curves of these three samples at various rates.

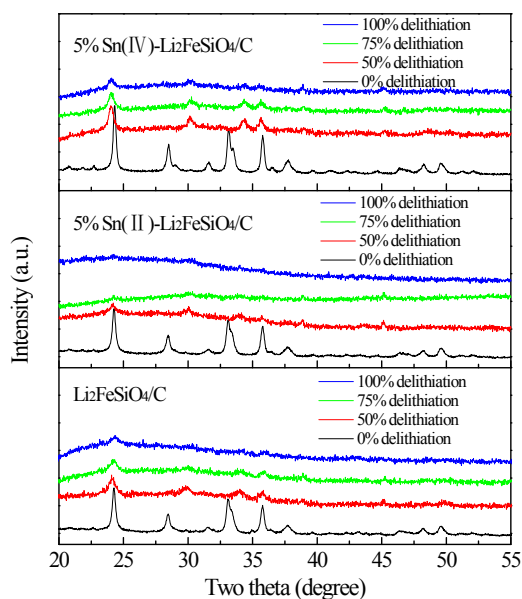

Figure S14. XRD patterns after chemical extraction of lithium. Bottom: material  $\text{Li}_2\text{FeSiO}_4/\text{C}$ , middle: material 5 %  $\text{Sn}(\text{II})\text{-Li}_2\text{FeSiO}_4/\text{C}$ , top: 5 %  $\text{Sn}(\text{IV})\text{-Li}_2\text{FeSiO}_4/\text{C}$ .

Chemical extraction of lithium from the samples were carried out by using the oxidizer,  $\text{NO}_2\text{BF}_4$  (95+ % purity, Aldrich), in acetonitrile medium at room temperature with constantly stirring for 48 hours. The reaction process is the following:

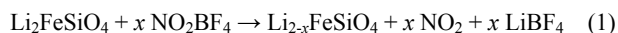

The high reactivity of  $\text{NO}_2\text{BF}_4$  lead to the possibilities of its decomposition and side reactions, the experiments invariably required more amounts of the oxidizer.<sup>4</sup> Here, the  $\text{NO}_2\text{BF}_4$  were added 25 % more than the theoretical value. The Li-ions were extracted by the following percentage: 50 %, 75 % and 100 %, equaling to 1 Li, 1.5 Li and 2 Li extraction from all the three samples, respectively.

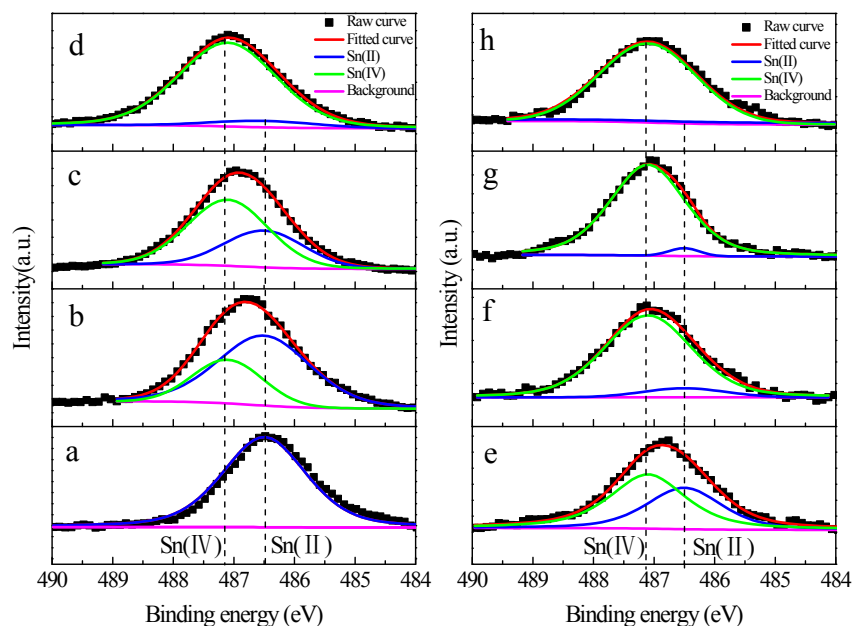

Figure S15. (1) Sn 3d 5/2 spectra of 5 %  $\text{Sn}(\text{II})\text{-Li}_2\text{FeSiO}_4/\text{C}$ , with chemical delithiation: (a) 0 %, (b) 50 %, (c) 75 %, (d) 100 %;

(2) Sn 3d 5/2 spectra of 5 %  $\text{Sn}(\text{IV})\text{-Li}_2\text{FeSiO}_4/\text{C}$  with chemical delithiation: (a) 0 %, (b) 50 %, (c) 75 %, (d) 100 %.

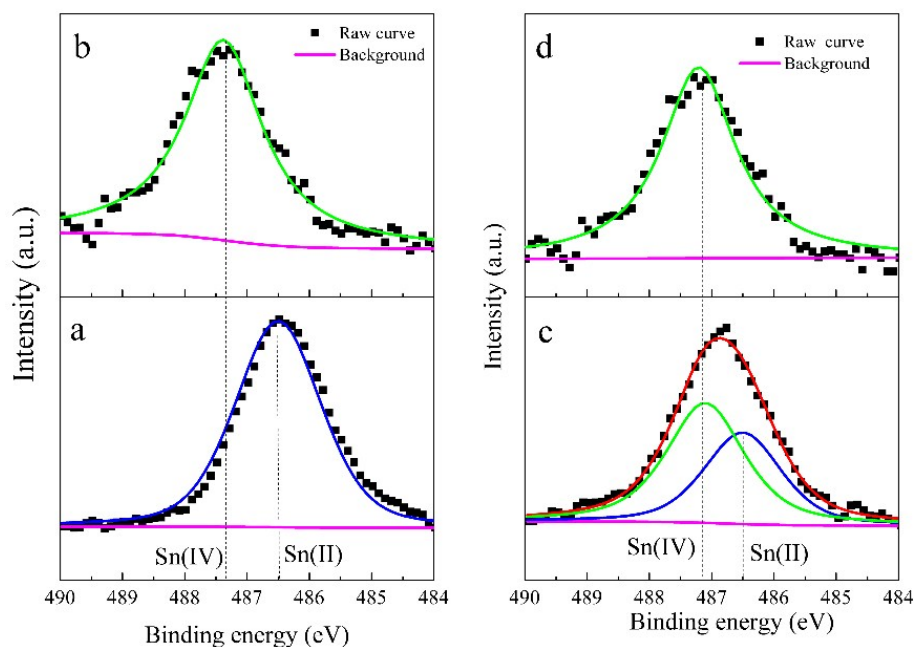

Figure S16. Sn 3d 5/2 spectra of (1) 5 % Sn(II)-Li<sub>2</sub>FeSiO<sub>4</sub>/C electrode (a) before charged (b) after fully charged at 4.8 V; (2) 5 % Sn(IV)-Li<sub>2</sub>FeSiO<sub>4</sub>/C electrode (c) before charged (d) after fully charged at 4.8 V.

Table S5. Sn(II) and Sn(IV) content fitted by Sn3d 5/2 of 5 % Sn(II)-Li<sub>2</sub>FeSiO<sub>4</sub> and 5 % Sn(IV)-Li<sub>2</sub>FeSiO<sub>4</sub> after chemical extraction of lithium.

|                                               | Sn(II) | Sn(IV) |
|-----------------------------------------------|--------|--------|
| 5 % Sn(II)-Li <sub>2</sub> FeSiO <sub>4</sub> |        |        |
| 0 % delithitated                              | 100 %  | 0      |
| 50 % delithitated                             | 70.1 % | 29.9 % |
| 75 % delithitated                             | 35.1 % | 64.9 % |
| 100 % delithitated                            | 6.9 %  | 93.1 % |
| 5 % Sn(IV)-Li <sub>2</sub> FeSiO <sub>4</sub> |        |        |
| 0 % delithitated                              | 41.6 % | 58.4 % |
| 50 % delithitated                             | 8.4 %  | 91.6 % |
| 75 % delithitated                             | 2.9 %  | 97.1 % |
| 100 % delithitated                            | 0      | 100 %  |

## References

1. R. Dedryvere, M. Maccario, L. Croguennec, F. Le Cras, C. Delmas and D. Gonbeau, *Chem Mater*, 2008, **20**, 7164-7170.
2. R. t. Shannon, *Acta Crystallographica Section A: Crystal Physics, Diffraction, Theoretical and General Crystallography*, 1976, **32**, 751-767.
3. J. Zio, *J Solid State Chem*, 1985, **57**, 269-290.
4. S. Venkatraman and A. Manthiram, *Chem Mater*, 2002, **14**, 3907-3912.
